# Supplementary material for: Optimizing the Relationship between Regulation and Innovation in Dietary Supplements: A Case Study of Food with Function Claims in Japan
Source: MDPI journal article supplement (doi:10.3390/nu15020476), 2023-01-16
Supplement: s1 [file s1]

Supplementary Materials

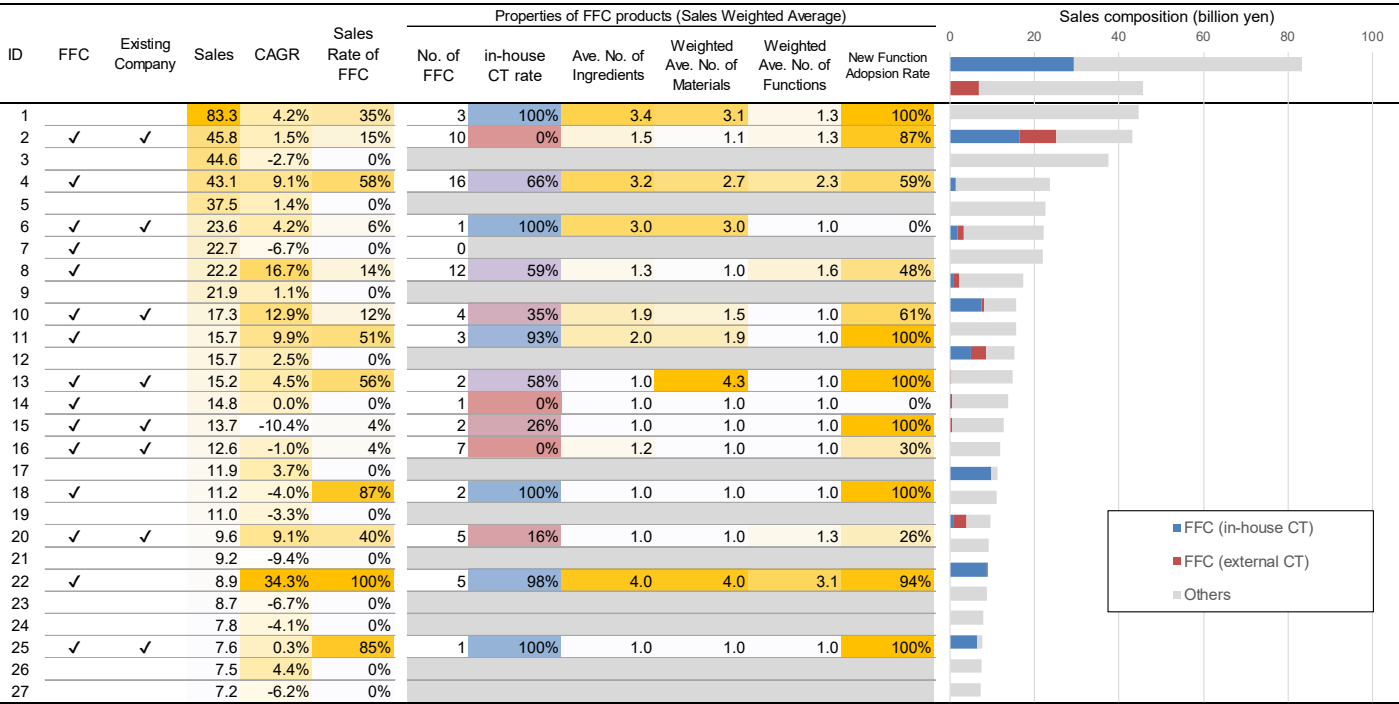

Supplementary Figure S1. Dataset of the 27 target companies.

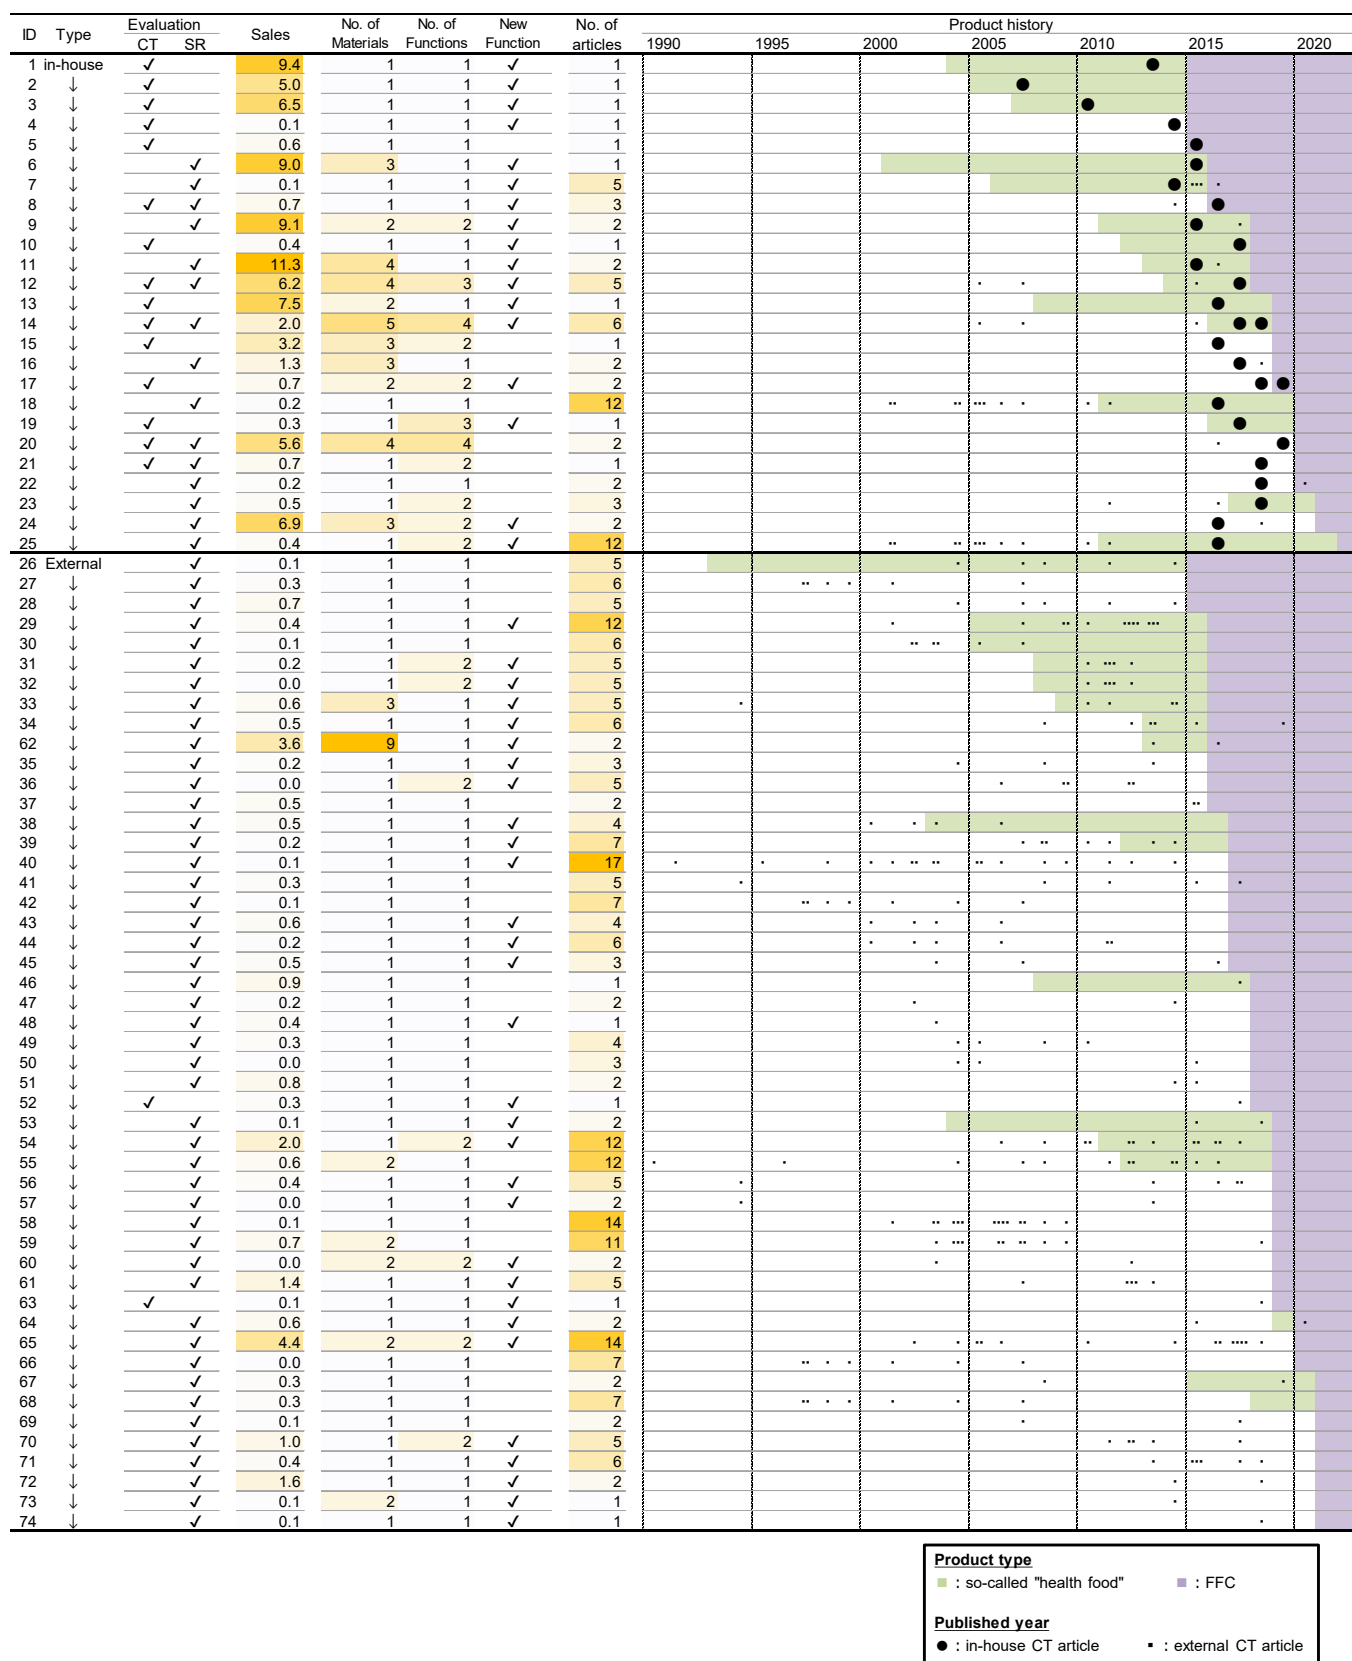

Supplementary Figure S2. List of products (n = 74).
